# Supplementary material
Source: PubMed Central journal article supplement (PMC4354731)
Supplement: NIHMS669311-supplement-01.pdf [file NIHMS669311-supplement-01.pdf]

## SUPPLEMENTAL INFORMATION

| Variant Enzyme | WT Sdh | SdhB-R205S | SdhB-K230L | DW35 | WT Frd | FrdB-S203R | FrdB-K228L | FrdB-K228E | FrdB-K228R | DW35 |
|----------------|--------|------------|------------|------|--------|------------|------------|------------|------------|------|
| nmol/mg Flavin | 2.0    | 2.0        | 1.8        | ND   | 1.2    | 1.6        | 2.5        | 2.2        | 2.4        | ND   |



**Supplemental Figure 1.** Assembly of Sdh and Frd variant enzymes. The concentrations of covalent flavin in each enzyme preparation are shown. 30  $\mu$ g of membrane proteins were separated on a 12% SDS polyacrylamide gel and visualized by Coomassie blue staining. The Coomassie blue stained SdhA and FrdA peptides are shown. ND: not determined.

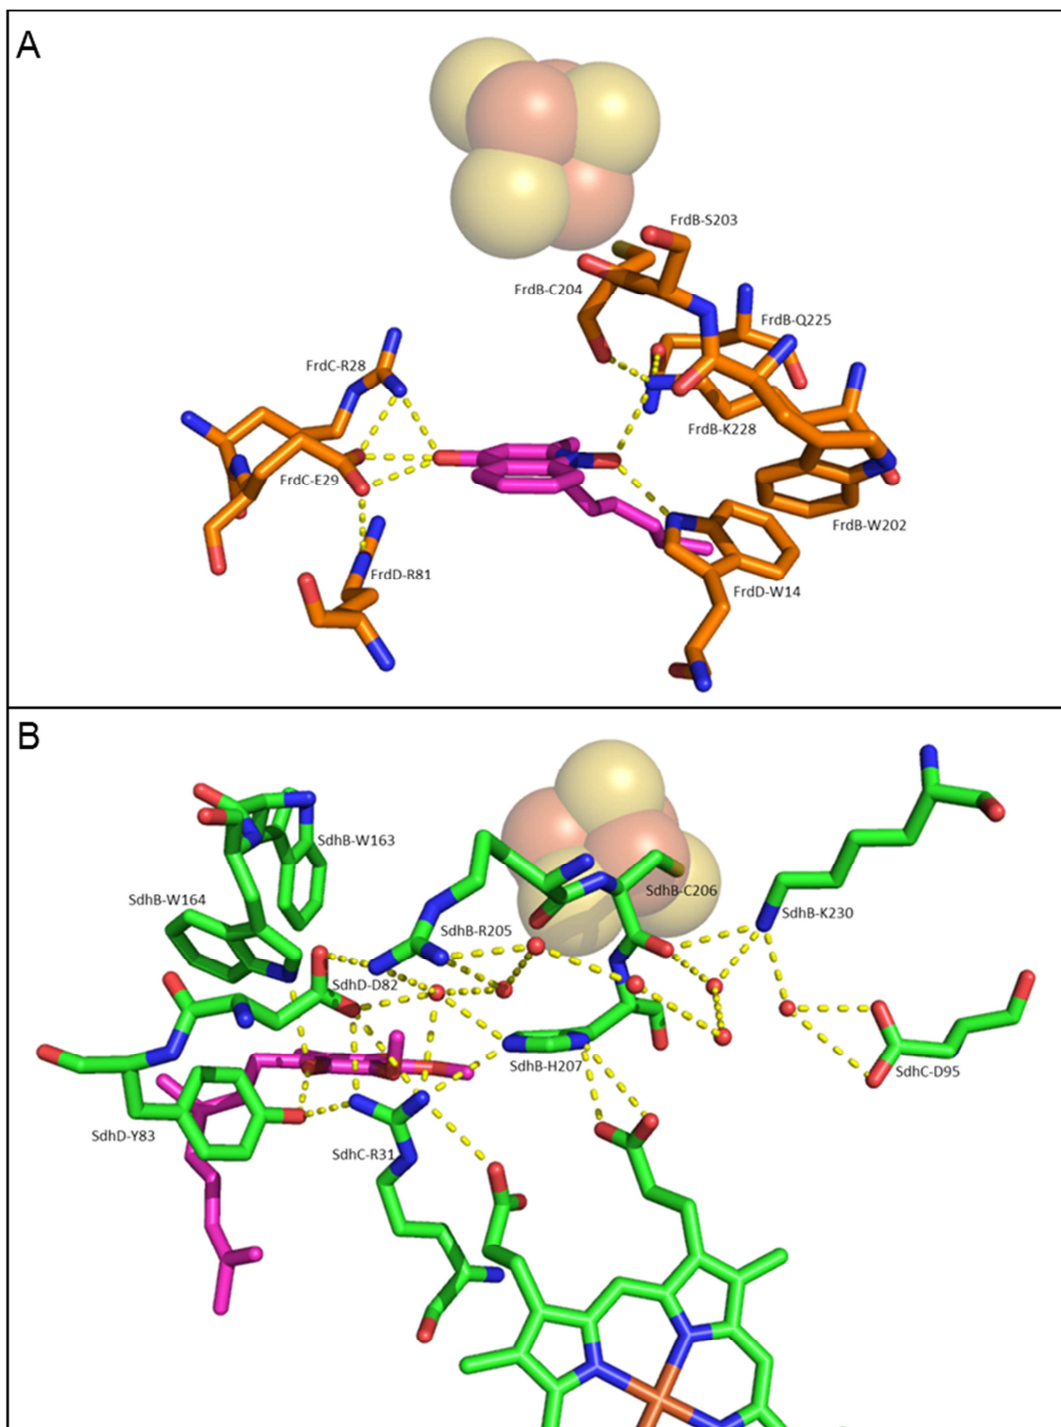

**Supplemental Figure 2.** H-bonding networks in the Q-site of Frd (A) and Sdh (B). Potential H-bonding partners (distance <math>< 3.5 \text{ \AA}</math> apart) are connected by dashed yellow lines. The two views were generated using PDB:1KF6 (Frd) and PDB:1NEK (Sdh) using PyMOL v.1.2r1 (DeLano Scientific LLC.).
